# Supplementary material
Source: Research Square preprint supplement (doi:10.21203/rs.3.rs-9530123/v1)
Supplement: Supplementary file 1 [file 616c1a09c1b5f86e58d6d8c4.docx]

**Supplementary figure 1**: **a**) Bar graph showing bacterial enumeration (CFU/ml), by method of Easy-Spiral serial dilution. The data is represented as mean±SD of at least triplicates from independent experiments. One-Way ANOVA, followed by Tukey’s multiple comparisons test, p > 0.2290 (ns). **b**) Percentage viability of Caco-2 cells, after exposure to increasing doses of H2O2, measured by MTT assay. The data is represented as mean±SD of quadruplicates from at least 7 independent experiments, One-Way ANOVA test has been performed, followed by Dunnett’s multiple comparisons test, with the values of p<0.0022 (**), p<0.0001 (****), and p>0.2019 (ns), respectively.

**Supplementary figure 4**. Effects of probiotic fermented fruit juice (PFJ) oral intake on the levels of metabolites in healthy mice. **a**) Box plot showing significant fold change of *1-methyl 5-imidazoleacetate*. Time point Ferm T1 indicates the blood sample from mice after reception of PFJ for 24 days and Ferm T0 is the blood sample at basal time point. **b**) Box plots showing significant fold change of valerate at day 24 exposure to PFJ (Ferm T1) compared to basal time point at day 0 (Firm T0). **c**) Box plots showing fold changes of bile acid, beta-Muricholate.
